# Supplementary figures and images for: Syntheses, crystal structures and magnetic properties of new oxalato-, croconato- and squarato-containing copper(ii) complexesElectronic supplementary information (ESI) available: Stereoview of the structure of compound 2 (Fig. S1) and X-ray data as described in the text. See http://www.rsc.org/suppdata/nj/b3/b301212n/
Source: Royal Society of Chemistry journal article supplement (doi:10.1039/b301212n), 2003-01-01

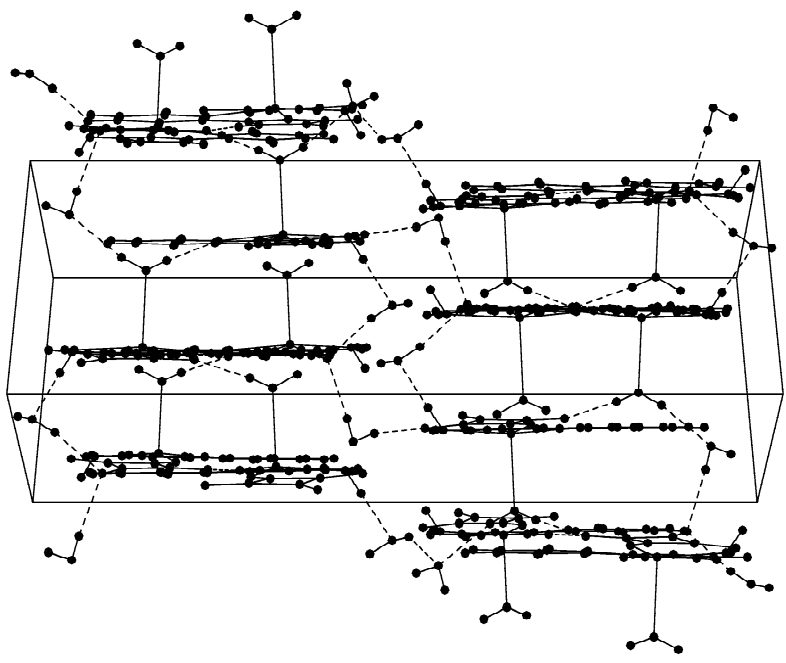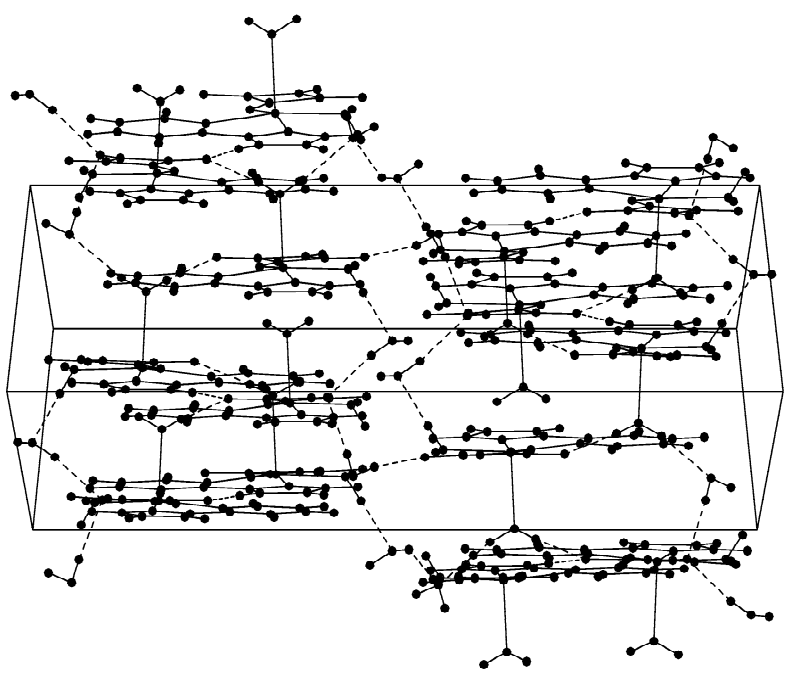

Supplement: b301212n.pdf [file b301212n.pdf]
